# Supplementary material for: Folate-targeted PEGylated liposomes improve the selectivity of PDT with meta-tetra(hydroxyphenyl)-chlorin (m-THPC)
Source: Royal Society of Chemistry journal article supplement (doi:10.1039/c3pp25384h), 2013-01-17
Supplement: c3pp25384h.pdf [file c3pp25384h.pdf]

## Supplementary Information

### Folate-targeted PEGylated liposomes improve the selectivity of PDT with *meta*-tetra(hydroxyphenyl)chlorin (*m*-THPC)

Francesca Moret,<sup>a</sup> Dietrich Scheglmann,<sup>b</sup> and Elena Reddi\*<sup>a</sup>

<sup>a</sup> Department of Biology, University of Padova, via Ugo Bassi 58/B, 35121, Padova, Italy. Fax: +39 049 8276300; Tel: +39 049 8276335; E-mail: elena.reddi@unipd.it

<sup>b</sup> Biolitec Research GmbH, Otto-Schott-Strasse 15, 07745, Jena, Germany.

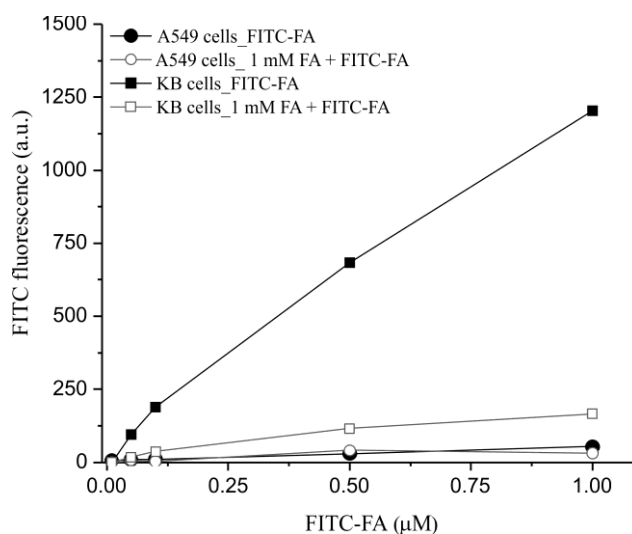

Fig. S1. Flow cytometry measurements of FITC-folate (FITC-FA) conjugate uptake in KB and A549 cells. The uptake in cells incubated 5 h with increasing concentration of FITC-FA was compared with the uptake in cells pre-treated for 1 h with 1 mM free folic acid and then incubated with the FITC-FA conjugate.
